# Supplementary material
Source: publisher site journal article supplement (https://www.dovepress.com/article/244155)
Supplement: Supplementary file 1 [file get_supplementary_file.php]

**Figure S1**. Serial white blood count and eosinophilia in relation with anti-tuberculosis.

**Table S1. Summary of laboratory and imaging result of the patient**

| Date | WBC | | PMNC% | L% | Eosinophil% | Hct | Plt | ESR | | ALP | AST | ALT | |
| --- | --- | --- | --- | --- | --- | --- | --- | --- | --- | --- | --- | --- | --- |
| 12/8/2018 | 15,500 | | 25 | 20 | 50 | 39 | 501,700 | 90 | | 197 | 34 | 43 | |
| 3/9/2018 | 9,500 | | 41% | 23 | 40 | 38 | 386,000 |  | |  | 19 | 17 | |
| 10/9/2018 | 8,000 | | 25 | 29 | 37 | 40 | 336,700 |  | |  |  |  | |
| 25/9/208 | 6,236 | | 31 | 45 | 15 | 44 | 230,000 | 50 | |  | 16 | 13 | |
| 23/11/2018 | 10,120 | | 51 | 37 | 3.9 | 45 | 350,000 | 20 | |  |  |  | |
| 25/4/2019 | 9,630 | | 71.2 | 19.6 | 2.6 | 44 | 153,400 | 15 | |  | 15 | 20 | |
| Serial Abdominal Imaging | | | | | | | | | | | | |
| Date | | Description | | | | | | | Conclusion | | | | | |
| Initial | | Right side liver lobe measured ~13cm plus the areas are with abnormal echo pattern. The abnormal echoes are in the right side of the liver lobe mainly 8 and 7 segments, | | | | | | | Abnormal liver echo areas secondary to ? Antibiotic treated hepatic abscesses. | | | | | |
